# Supplementary material for: On water synthesis of pyran–chromenes via a multicomponent reactions catalyzed by fluorescent t-ZrO2nanoparticles
Source: Royal Society of Chemistry journal article supplement (doi:10.1039/c5ra19290k), 2015-01-01

## Supplementary data

### **On water synthesis of pyran-chromenes *via* multicomponent reactions catalyzed by fluorescent *t*-ZrO<sub>2</sub> nanoparticles**

| <b>Contents</b>                                                                                                                                                    | <b>Page No.</b> |
|--------------------------------------------------------------------------------------------------------------------------------------------------------------------|-----------------|
| <b>ESI-1.</b> Method for the preparation of <i>t</i> -ZrO <sub>2</sub> nanoparticles                                                                               | 02              |
| <b>ESI-2.</b> Characterization of nanoparticles                                                                                                                    |                 |
| <b>a)</b> Size distribution of <i>t</i> -ZrO <sub>2</sub> nanoparticles by HRTEM                                                                                   | 03              |
| <b>b)</b> EDX analysis of <i>t</i> -ZrO <sub>2</sub> nanoparticles                                                                                                 | 03              |
| <b>ESI-3.</b> Method for the preparation of <i>m</i> -ZrO <sub>2</sub> nanoparticles                                                                               | 04              |
| <b>ESI-4.</b> Experimental procedure for the synthesis of 2-amino-3-cyano-4-phenyl-4H-benzo[ <i>h</i> ]chromene                                                    | 05              |
| <b>ESI-5.</b> Reusability study of <i>t</i> -ZrO <sub>2</sub> nanoparticles                                                                                        |                 |
| <b>a)</b> PXRD of reused <i>t</i> -ZrO <sub>2</sub> nanoparticles                                                                                                  | 06              |
| <b>b)</b> Fluorescence study of reused <i>t</i> -ZrO <sub>2</sub> nanoparticles                                                                                    | 06              |
| <b>c)</b> AAS analysis of fresh and reused <i>t</i> -ZrO <sub>2</sub> nanoparticles                                                                                | 07              |
| <b>d)</b> FT-IR of 2-amino-3-cyano-4-phenyl-4H-benzo[ <i>h</i> ]chromene                                                                                           | 07              |
| <b>ESI-6.</b> Experimental procedure for the synthesis of 2-amino-5-oxo-4-phenyl-4,5-dihydropyrano[3,2- <i>c</i> ]chromene-3-carbonitrile                          | 08              |
| <b>ESI-7.</b> Experimental procedure for the synthesis of 10,10-dimethyl-7-phenyl-10,11-dihydrochromeno[4,3- <i>b</i> ]chromene-6,8(7 <i>H</i> ,9 <i>H</i> )-dione | 08              |
| <b>ESI-8.</b> Representative <sup>1</sup> HNMR copies of compounds                                                                                                 | 09-21           |

**Materials:** All the chemicals and reagents used in this work have been purchased from Sigma Aldrich without out further purification. The solvents were purchased from Himedia Pvt. Ltd. and distilled before use. Deionised water was used wherever required.

**ESI-1. Method for the preparation of *t*-ZrO<sub>2</sub> nanoparticles:**

*t*-ZrO<sub>2</sub> nanoparticles (NPs) have been synthesized by dissociation of ZrO<sub>2</sub>Cl<sub>2</sub>.8H<sub>2</sub>O in a basic medium (pH~10) at low temperature without adding any stabiliser. For synthesizing *t*-ZrO<sub>2</sub> NPs, 40 ml 0.05M NaOH solution in distilled water was added in 100 ml 0.005M solution of ZrO<sub>2</sub>Cl<sub>2</sub>.8H<sub>2</sub>O in methanol-water (1:1) drop by drop over 30 minutes at constant temperature (5 °C) with continuous stirring. The mixture was then stirred for 1 hour. Subsequently, the sol solution was aged at 100 °C for 24 hours with continuous stirring. After that, the solids were separated by centrifugation and washed with dilute solution of NH<sub>4</sub>NO<sub>3</sub> until negative test for chloride ion followed by washed with de-ionized water (4x20 ml) and ethanol (2x10 ml). As prepared solids were dried well and then calcined at 500 °C for 4 hours. The formation of nano-sized *t*-ZrO<sub>2</sub> particles was confirmed by powder XRD, HRTEM, SEM and UV-Vis studies.

ESI-2. Characterization of  $t$ -ZrO<sub>2</sub> nanoparticles:a) Size distribution of  $t$ -ZrO<sub>2</sub> nanoparticles by HRTEM: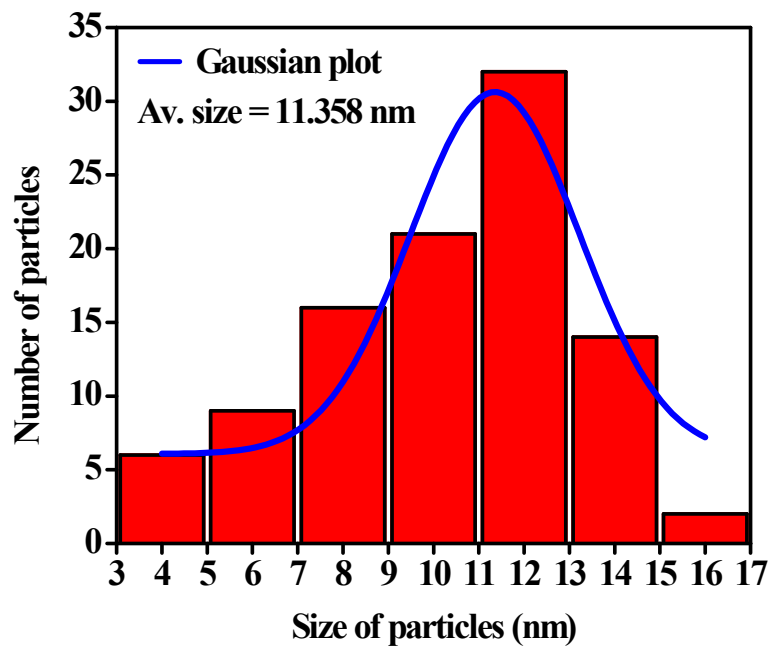

**Fig. S1.** Size distribution histogram of  $t$ -ZrO<sub>2</sub> NPs by HRTEM analysis over 100 particles.

b) EDX analysis of fresh  $t$ -ZrO<sub>2</sub> nanoparticles:

|                  | Wt% of Zr | Wt% of O | Wt% ratio (Zr:O) | Av. %age of oxygen vacancies |
|------------------|-----------|----------|------------------|------------------------------|
| Expected         | 74.03     | 25.97    | 2.85             | ~2.52                        |
| EDX result (Av.) | 76.55     | 23.45    | 3.26             |                              |

**ESI-3. Method for the preparation and characterization of *m*-ZrO<sub>2</sub> nanoparticles:****a) Method for the preparation of *m*-ZrO<sub>2</sub> nanoparticles:**

*m*-ZrO<sub>2</sub> nanoparticles (NPs) have been synthesized by dissociation of ZrO<sub>2</sub>Cl<sub>2</sub>·8H<sub>2</sub>O in a basic medium (pH~10) at low temperature without adding any stabiliser following the above mentioned procedure (ESI-1) and calcined at 800 °C for 4 hours. The formation of *m*-ZrO<sub>2</sub> NPs were confirmed by powder XRD analysis and the results were in good agreement with that of our previous report in Green Chemistry, 2015, 17, 2859 (The spectra was not given here).

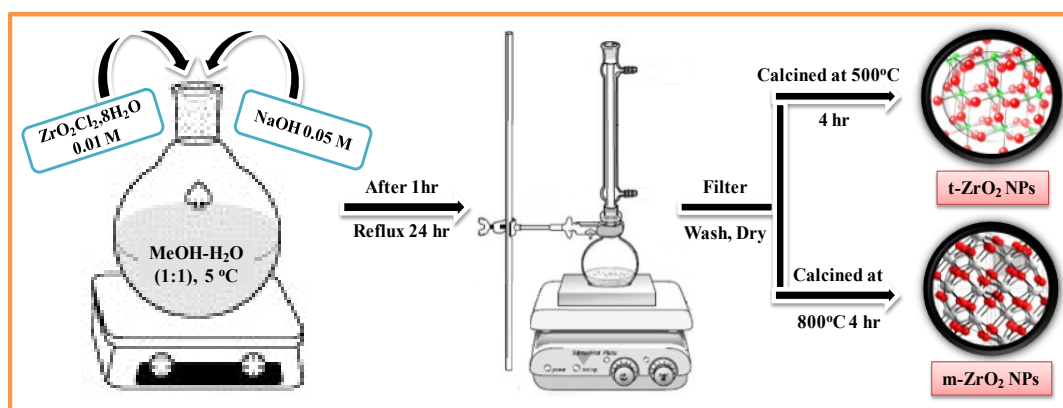

**Fig. S2.** Schematic representation for the synthesis of tetragonal (*t*) and monoclinic (*m*) ZrO<sub>2</sub> nanoparticles.

**ESI-4. Experimental procedure for the synthesis of 2-Amino-3-cyano-4-phenyl-4H-benzo[*h*]chromene:**

A mixture of the benzaldehyde (1 mmol, 106 mg), malononitrile (1 mmol, 66 mg), 1-naphthol (1 mmol, 144 mg) and *t*-ZrO<sub>2</sub> catalyst (10 mmol%, 12 mg) was refluxed in 5 mL water for 30 minutes indicated by TLC. After the completion of the reaction, the solid product along with catalyst were separated by simple filtration and then dissolve in hot ethanol and subjected to filtration to separate the catalyst. The separated catalyst was then washed with ethyl acetate and hot methanol. Pure yellow crystals were obtained through slow evaporation of the filtrate. Finally, the crystalline compounds were washed with ethanol to produce pure 2-amino-3-cyano-4-phenyl-4H-benzo[*h*]chromene (1a) (yield = 92%, 274 mg) as yellow solid (M.P = 205-207°C). Further the formation of the compound confirmed by <sup>1</sup>H NMR study. <sup>1</sup>H NMR (CDCl<sub>3</sub>, 500 MHz) δ = 4.71 (2H, s, NH<sub>2</sub>), 4.85 (1H, s, CH). 7.06 (1H, d, J<sub>HH</sub> = 8.5 Hz, Ar), 7.16 -7.32 (5H, m, Ar). 7.46 -7.64 (3H, m, Ar). 7.78 (1H, d, J<sub>HH</sub> = 7.5 Hz, Ar), 8.14 (1H, d, J<sub>HH</sub> = 7.5 Hz, Ar) ppm. These values are well accordance with the values reported in the literature.

ESI-5. Reusability study of *t*-ZrO<sub>2</sub> nanoparticles:

a) Powder XRD of reused *t*-ZrO<sub>2</sub> nanoparticles:

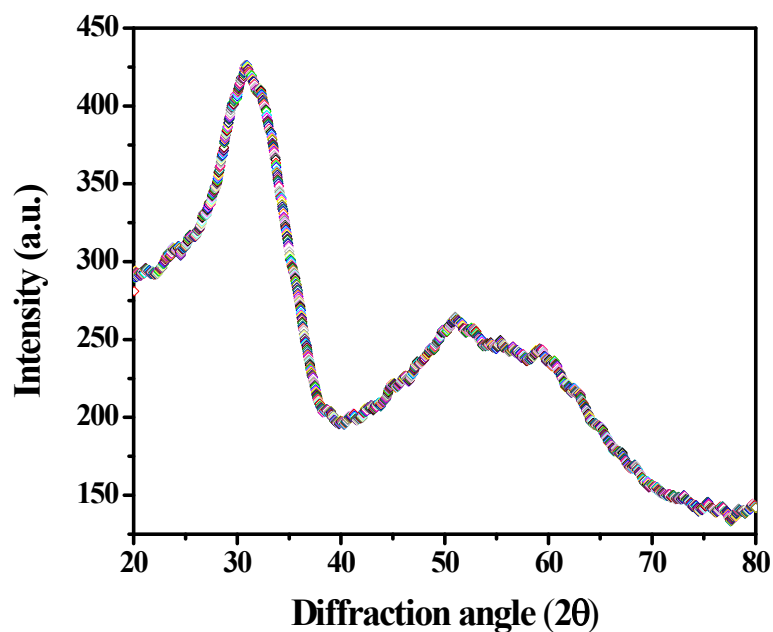

Fig. S3 Powder XRD pattern of *t*-ZrO<sub>2</sub> nanoparticles after 10<sup>th</sup> cycle.

b) Fluorescence study of reused *t*-ZrO<sub>2</sub> nanoparticles:

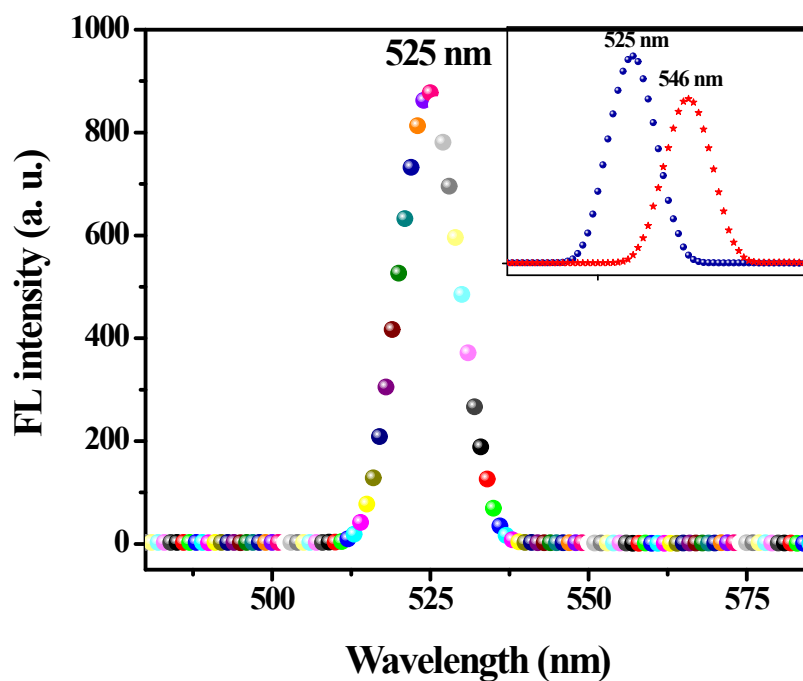

Fig. S4 Fluorescence spectrum of *t*-ZrO<sub>2</sub> nanoparticles in water after 10<sup>th</sup> cycle ( $\lambda_{\text{excitation}} = 260 \text{ nm}$ ).

c) Atomic Absorption Spectroscopic analysis of fresh and reused *t*-ZrO<sub>2</sub> nanoparticles:**Table 1** Wt percentage of Zr content in different run.

| Run   | Wt % of Zr |
|-------|------------|
| Fresh | 75.98      |
| 1     | 75.93      |
| 5     | 75.42      |
| 10    | 74.63      |

d) FT-IR study of product obtained by using recycled ZrO<sub>2</sub> NPs: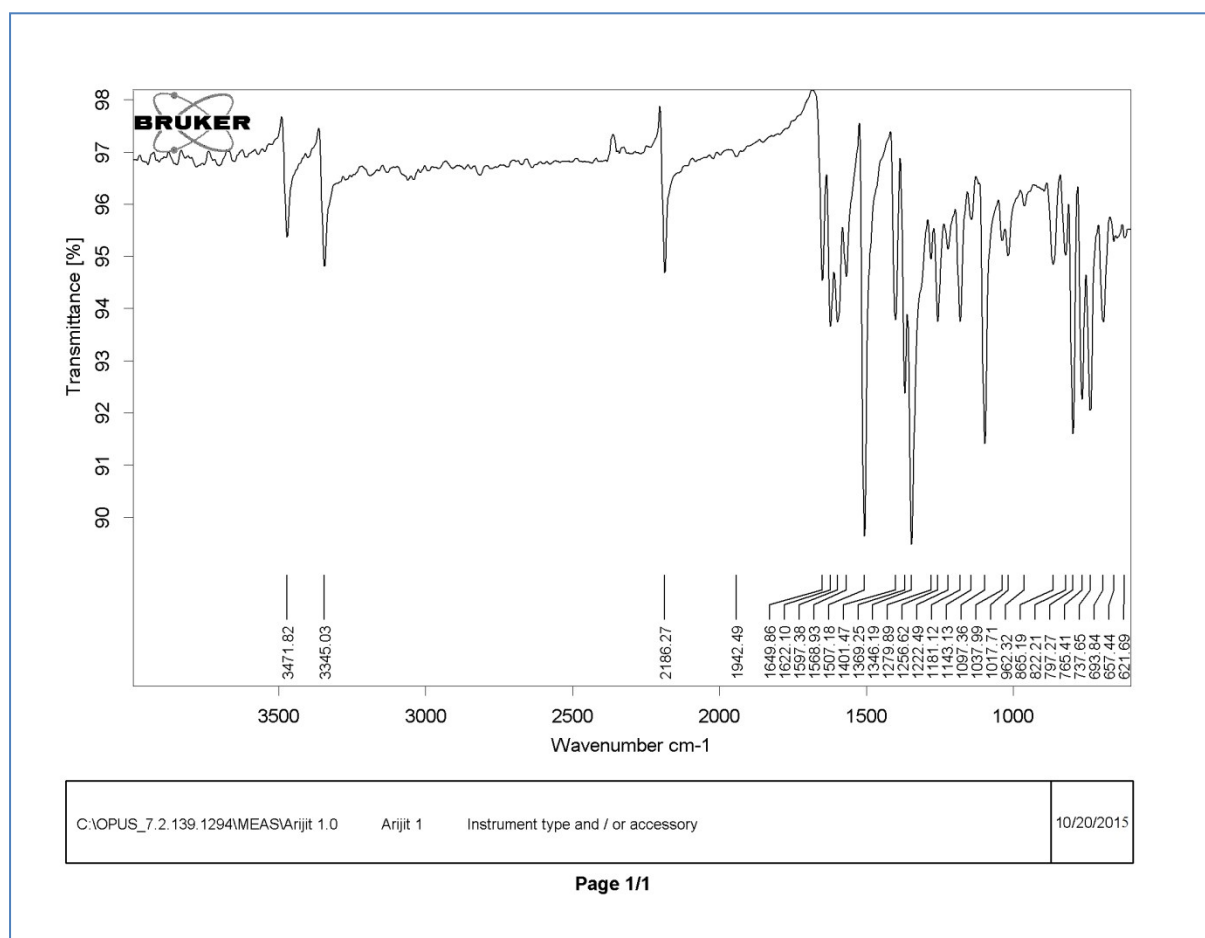**Fig. S5:** FT-IR spectra of 2-amino-3-cyano-4-phenyl-4H-benzo[h]chromene using recycled ZrO<sub>2</sub> NPs.

**ESI-6. Experimental procedure for the synthesis of 2-amino-5-oxo-4-phenyl-4,5-dihydropyrano[3,2-c]chromene-3-carbonitrile:**

A mixture of the benzaldehyde (1 mmol, 106 mg), malononitrile (1 mmol, 66 mg), 4-hydroxycoumarin (1 mmol, 162 mg) and *t*-ZrO<sub>2</sub> catalyst (10 mmol%, 12 mg) was refluxed in 5 mL water for 30 minutes indicated by TLC. After the completion of the reaction, the solid product along with catalyst were separated by simple filtration and then dissolve in hot ethanol and subjected to filtration to separate the catalyst. The separated catalyst was then washed with ethyl acetate and hot methanol. Pure white crystals were obtained after slow evaporation of the filtrate. Finally, the crystalline compound was washed with ethanol to get pure 2-amino-5-oxo-4-phenyl-4,5-dihydropyrano[3,2-c]chromene-3-carbonitrile (3a) (yield = 92%, 291 mg). Further, the formation of the compound was confirmed by melting point determination and <sup>1</sup>H NMR study. White solid, M.P. = 255–257, <sup>1</sup>H NMR (500 MHz, DMSO-d<sub>6</sub>) δ = 4.45 (1H, s, CH), 7.20-7.30 (3H, m, Ar), 7.31-7.37 (2H, m, Ar), 7.39 (2H, br s, NH<sub>2</sub>), 7.46-7.52 (2H, m, Ar), 7.73 (1H, t, J = 7.5 Hz, Ar), 7.91 (1H, d, J = 7.0 Hz, Ar) ppm.

**ESI-7. Experimental procedure for the synthesis of 10,10-dimethyl-7-phenyl-10,11-dihydrochromeno[4,3-*b*]chromene-6,8(7*H*,9*H*)-dione:**

A mixture of the benzaldehyde (1 mmol, 106 mg), malononitrile (1 mmol, 66 mg), 5,5-dimethyl-1,3-cyclohexanedione (1 mmol, 140 mg) and *t*-ZrO<sub>2</sub> catalyst (10 mmol%, 12 mg) was refluxed in 5 mL water for 25 minutes indicated by TLC. After the completion of the reaction, the solid product along with catalyst were separated by simple filtration and then dissolve in hot ethanol and subjected to filtration to separate the catalyst. The separated catalyst was then washed with ethyl acetate and hot methanol. Pure white crystals were obtained after slow evaporation of the filtrate. Finally, the crystalline compound was washed with ethanol to get the pure 10,10-dimethyl-7-phenyl-10,11-dihydrochromeno[4,3-*b*]chromene-6,8(7*H*,9*H*)-dione (4a) (yield = 91%, 339 mg). Further, the formation of the compound was confirmed by melting point determination and <sup>1</sup>H NMR study. White solid, M.P. = 227–229, <sup>1</sup>H NMR (500 MHz, DMSO-d<sub>6</sub>) δ = 0.90 (3H, s, CH<sub>3</sub>), 1.01 (3H, s, CH<sub>3</sub>), 2.36-2.62 (2H, m, CH<sub>2</sub>), 4.84 (1H, s, CH), 7.10-7.22 (3H, m, Ar), 7.31-7.40 (4H, m, Ar), 7.50 (1H, t, J = 7.2 Hz, Ar), 7.89 (1H, d, J = 7.5 Hz, Ar) ppm.



ESI-8. Representative  $^1\text{H}$ NMR copies of compounds: The NMR spectra were recorded in 500 or 400 MHz Bruker instrument and  $\text{CDCl}_3$  or  $\text{DMSO-d}_6$  were used as solvent.

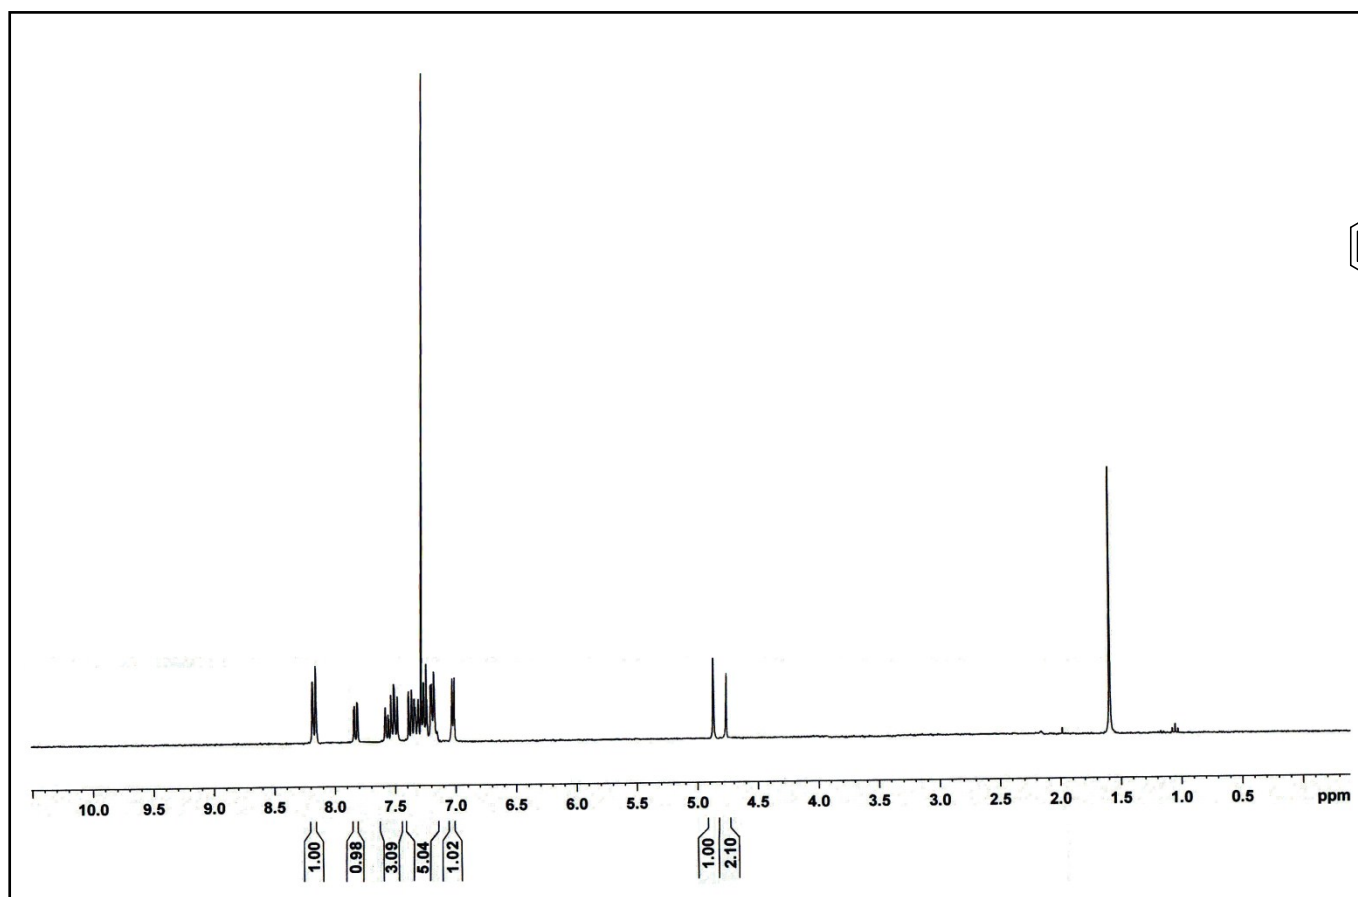

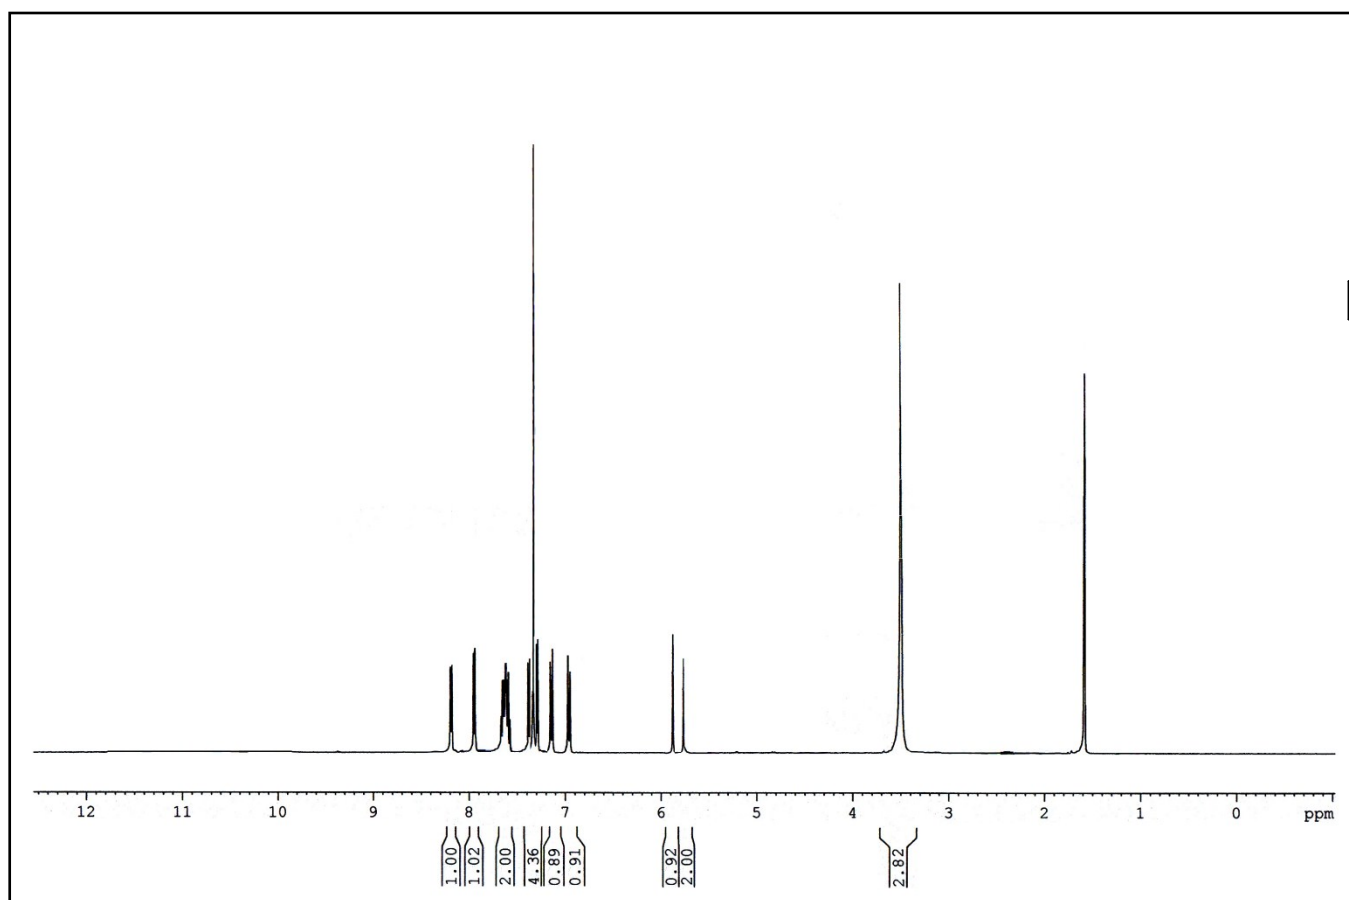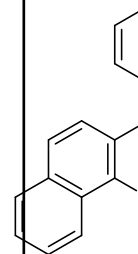

Entry 2,

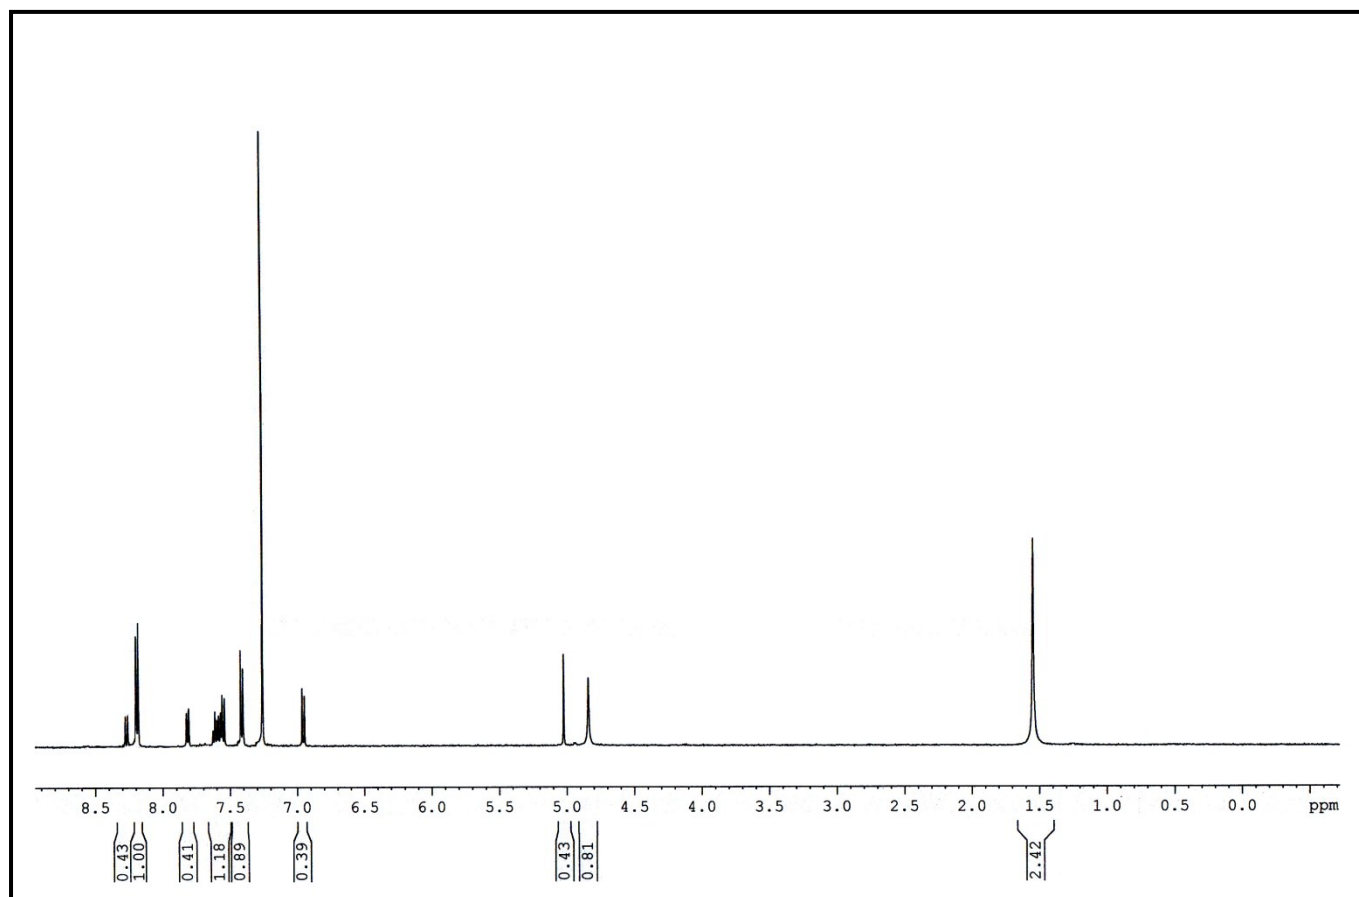

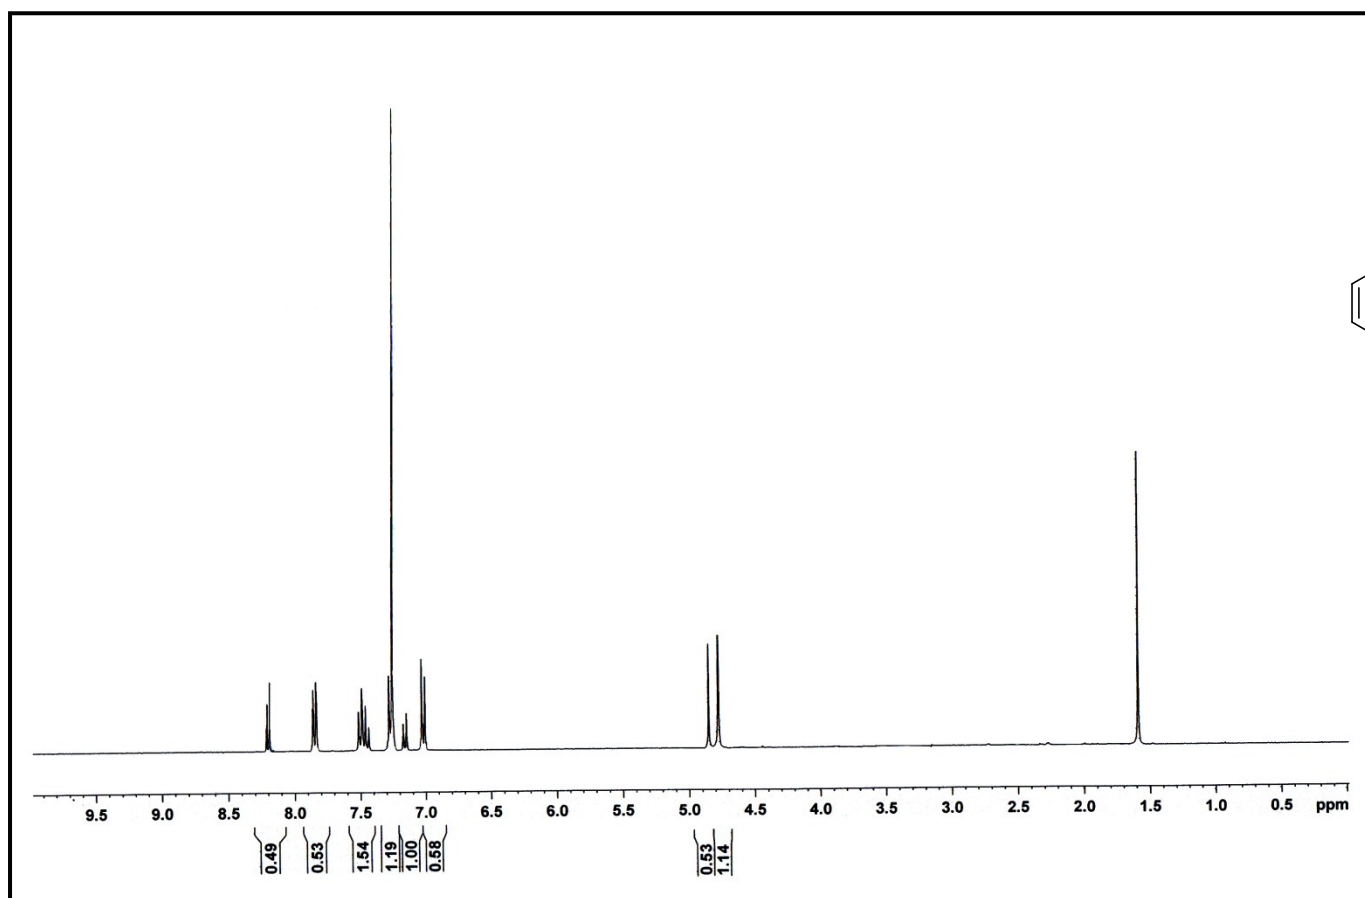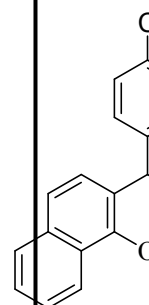

Entry 4, <sup>1</sup>H NMR

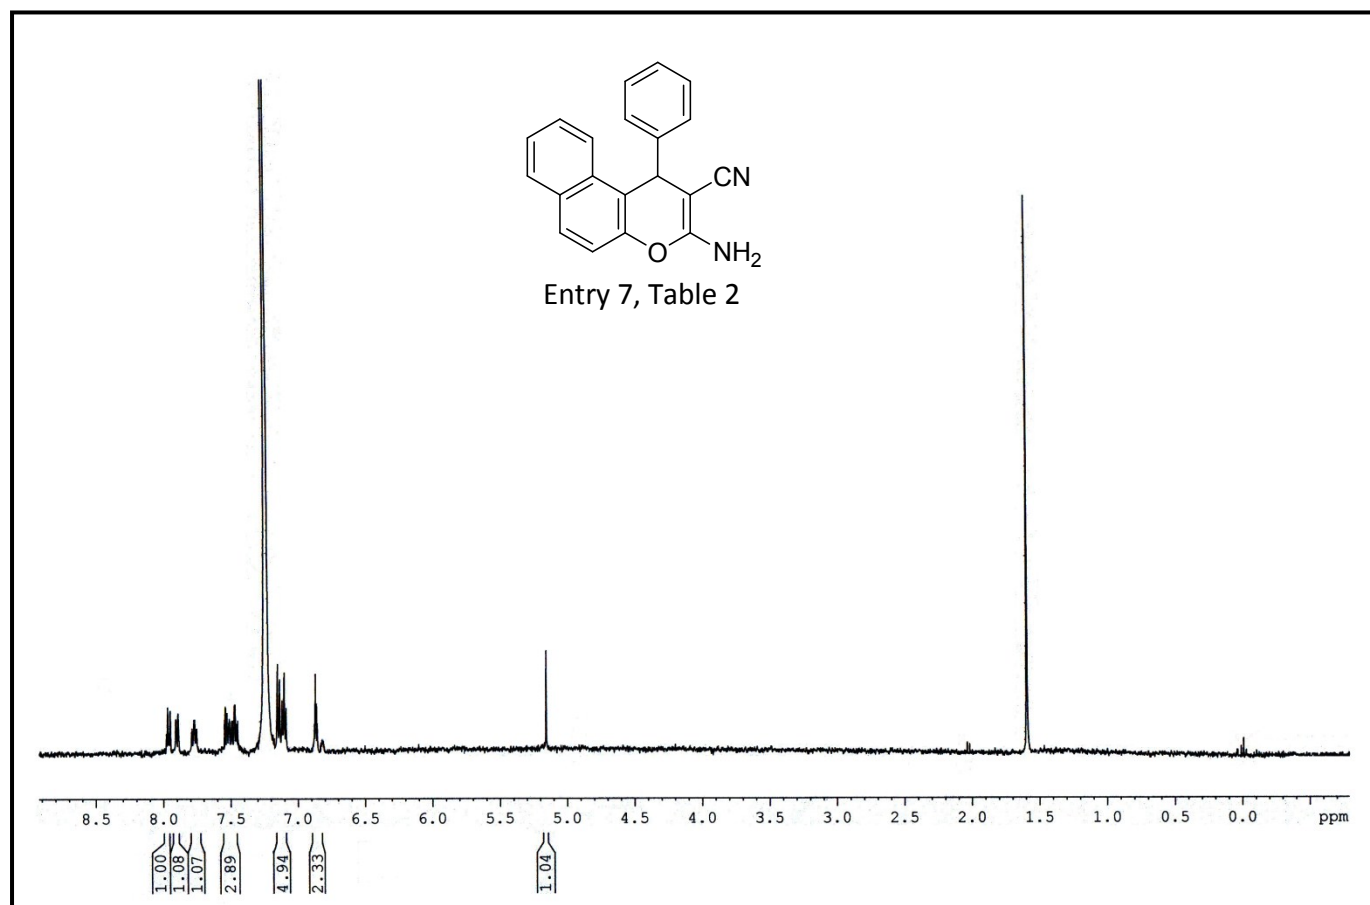

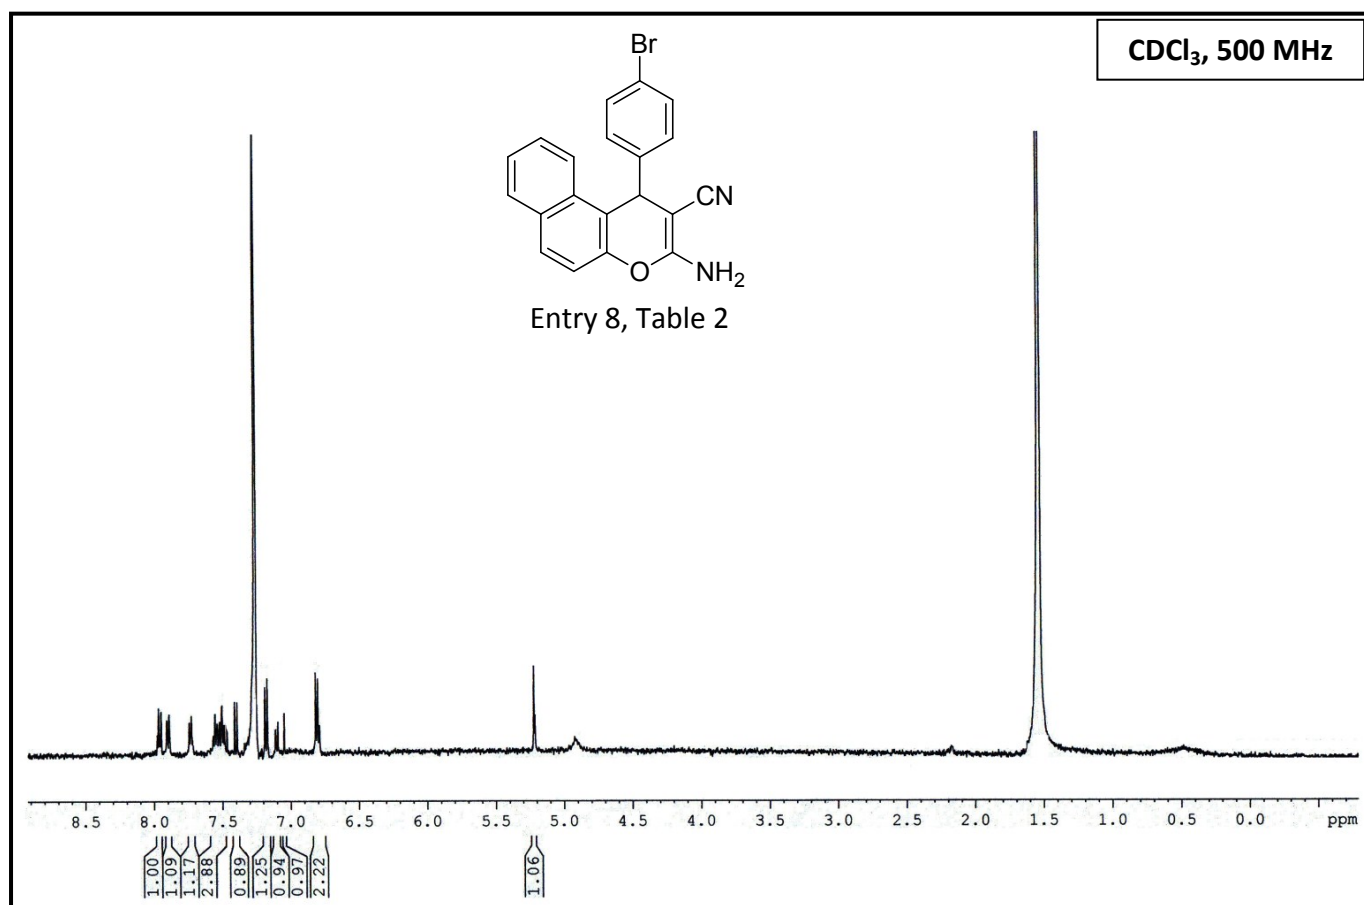

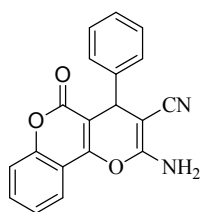

Entry 1, Table 3

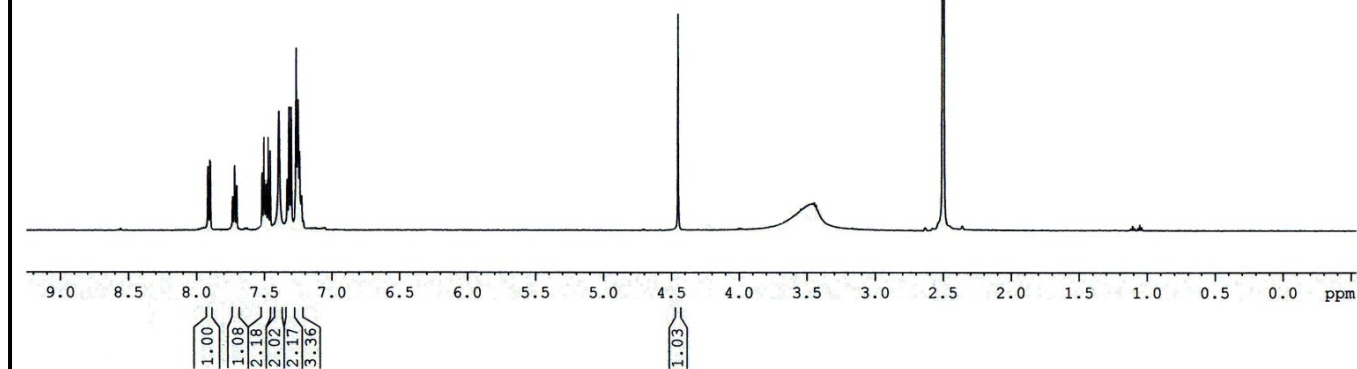

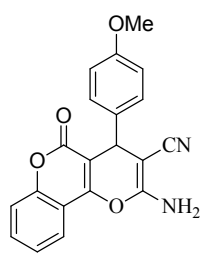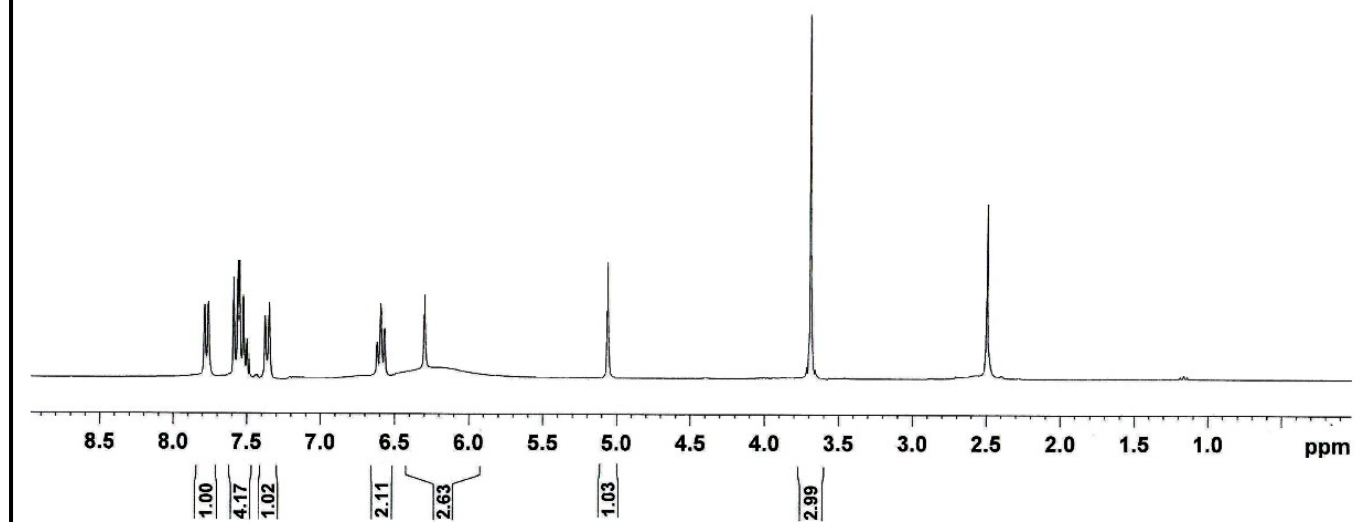



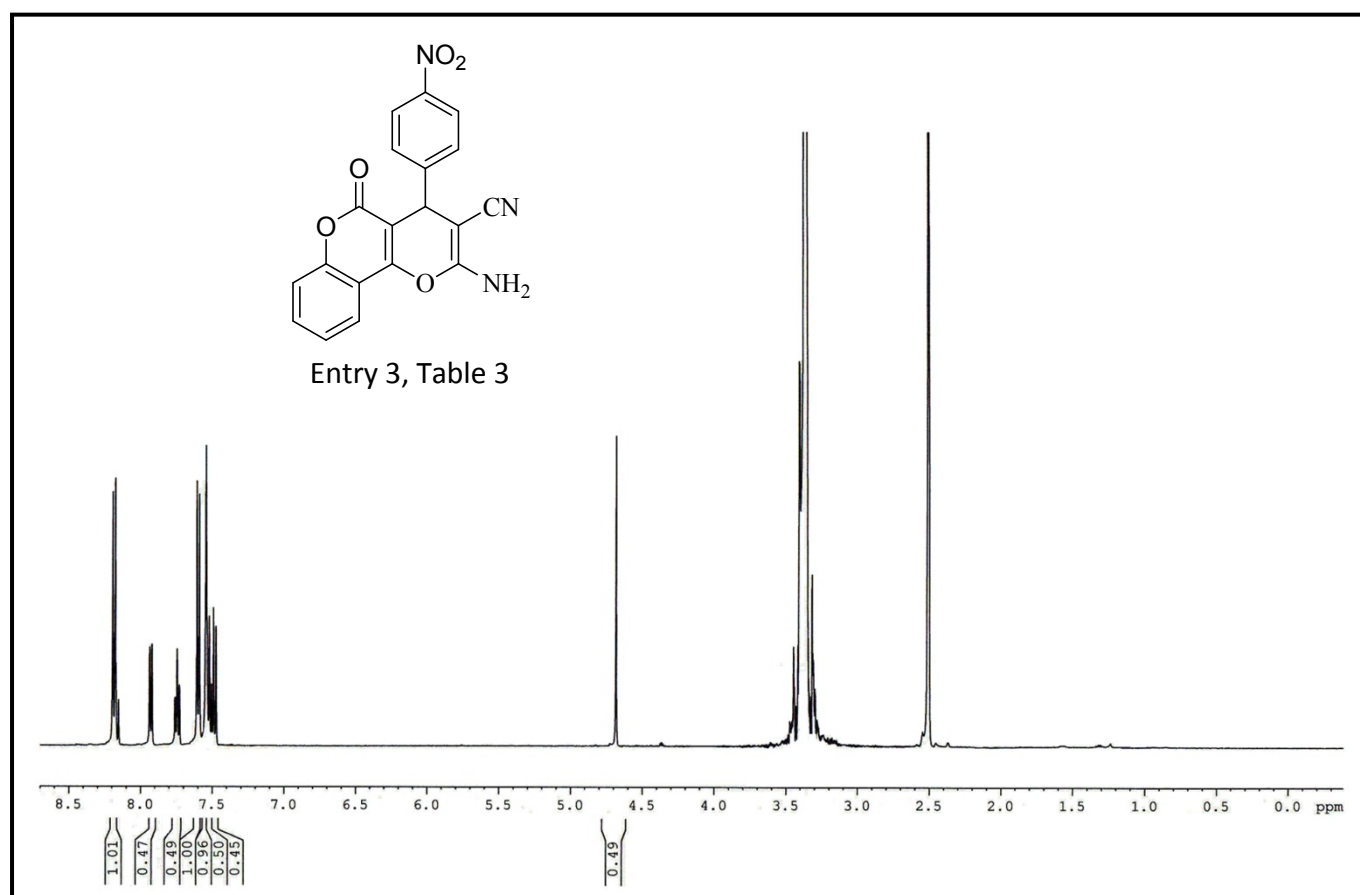

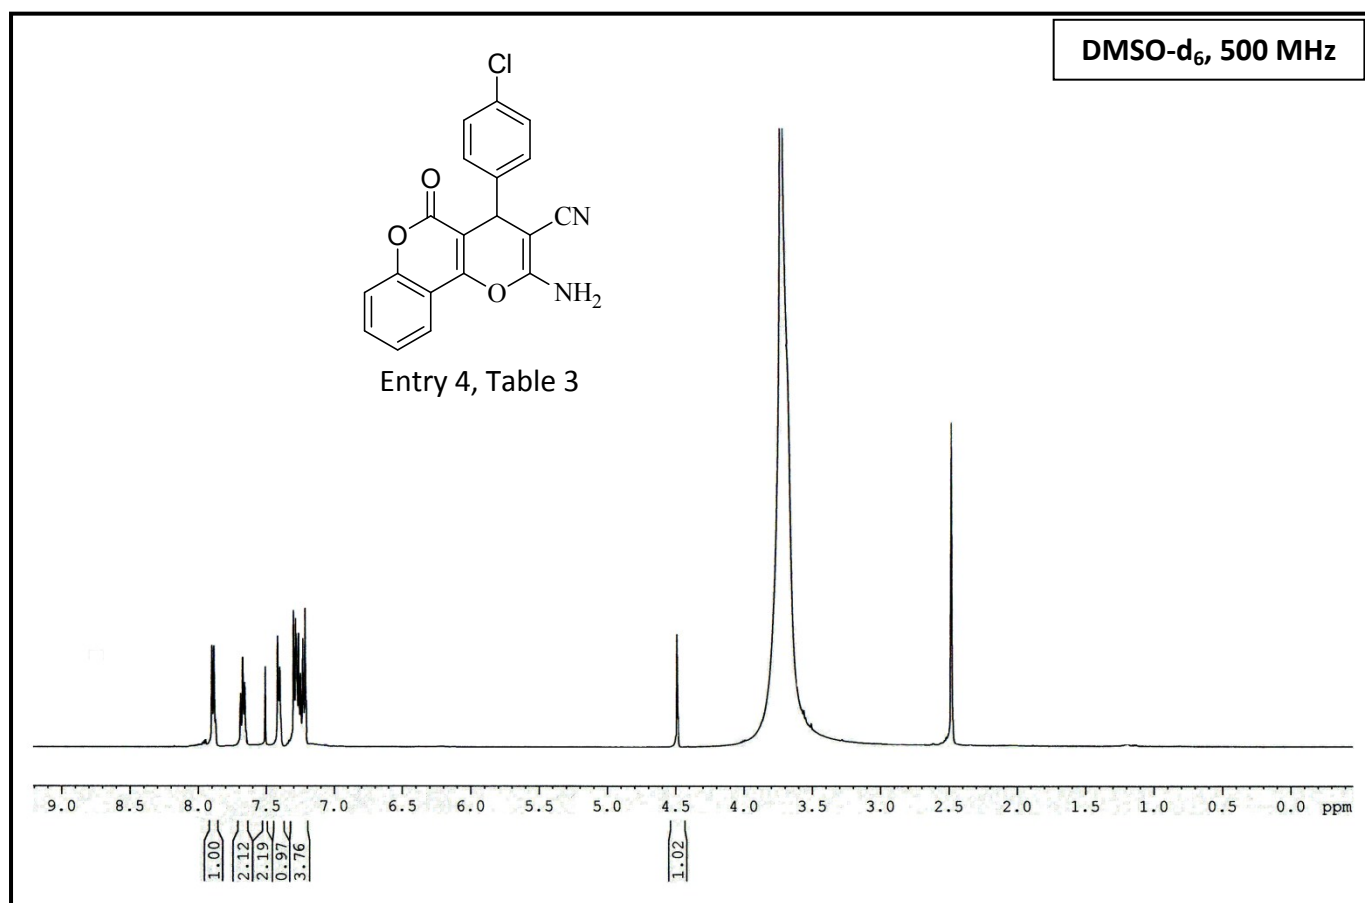

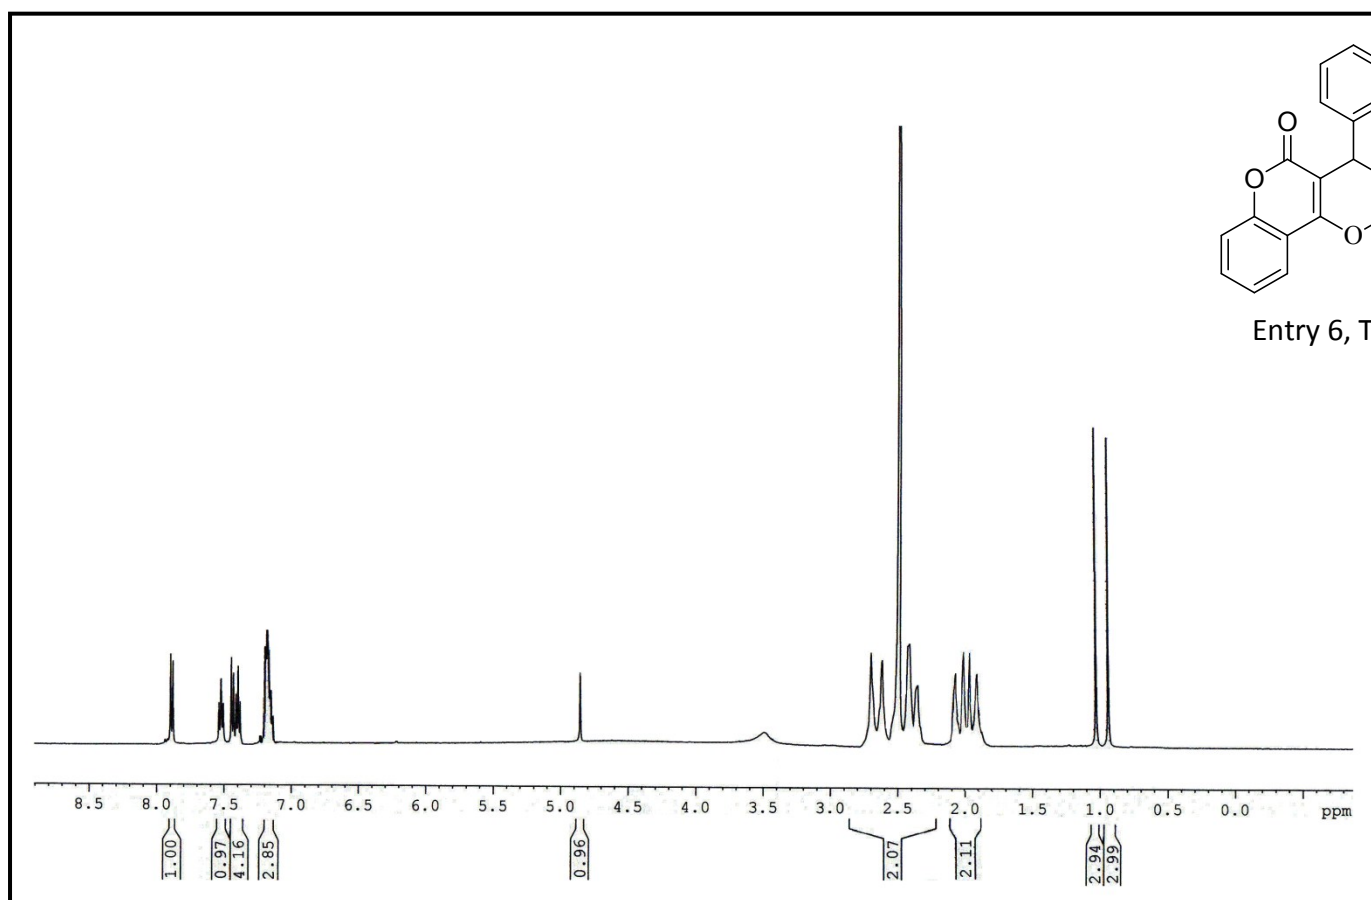

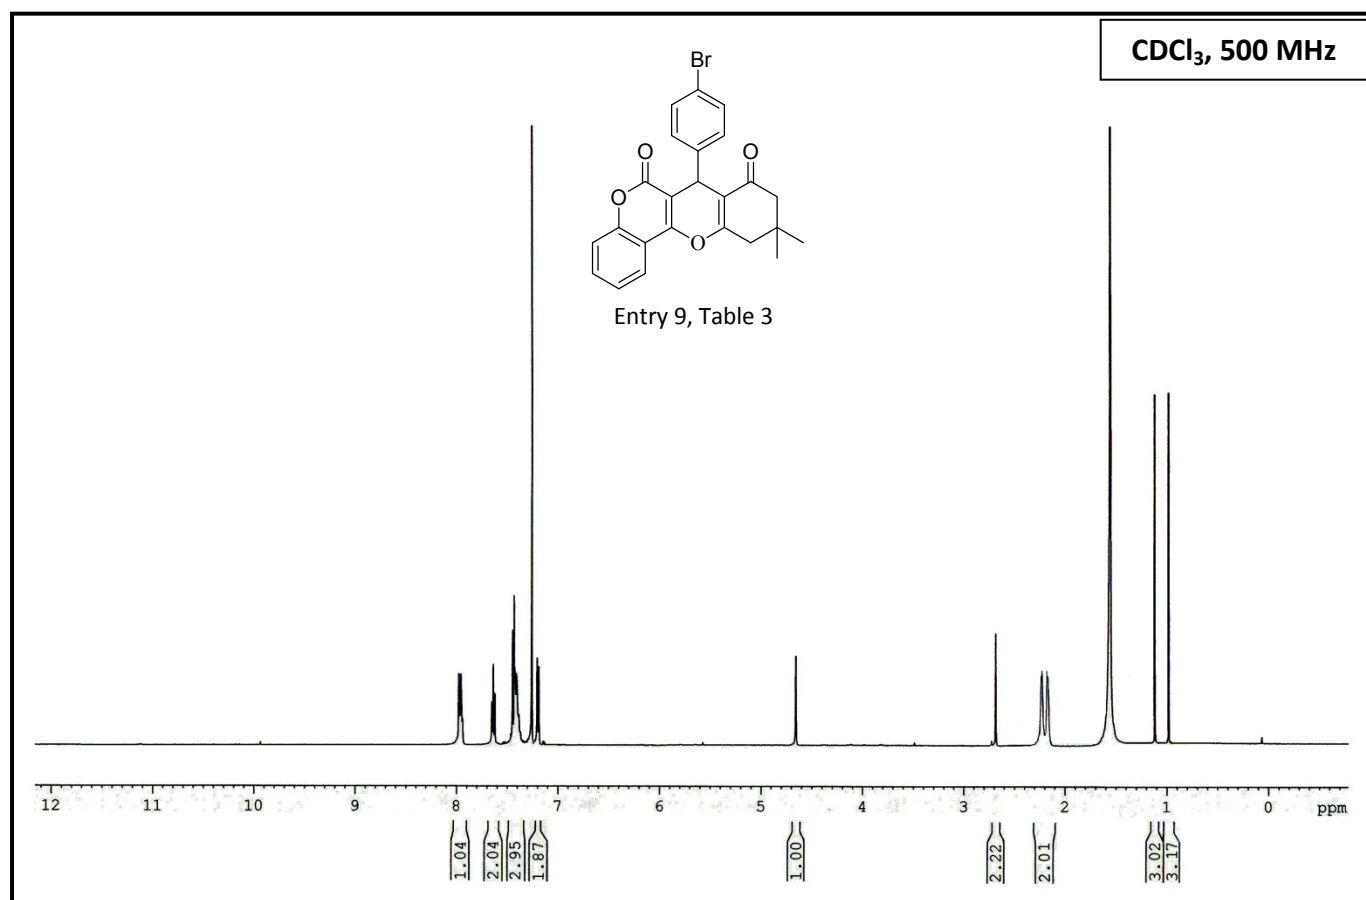

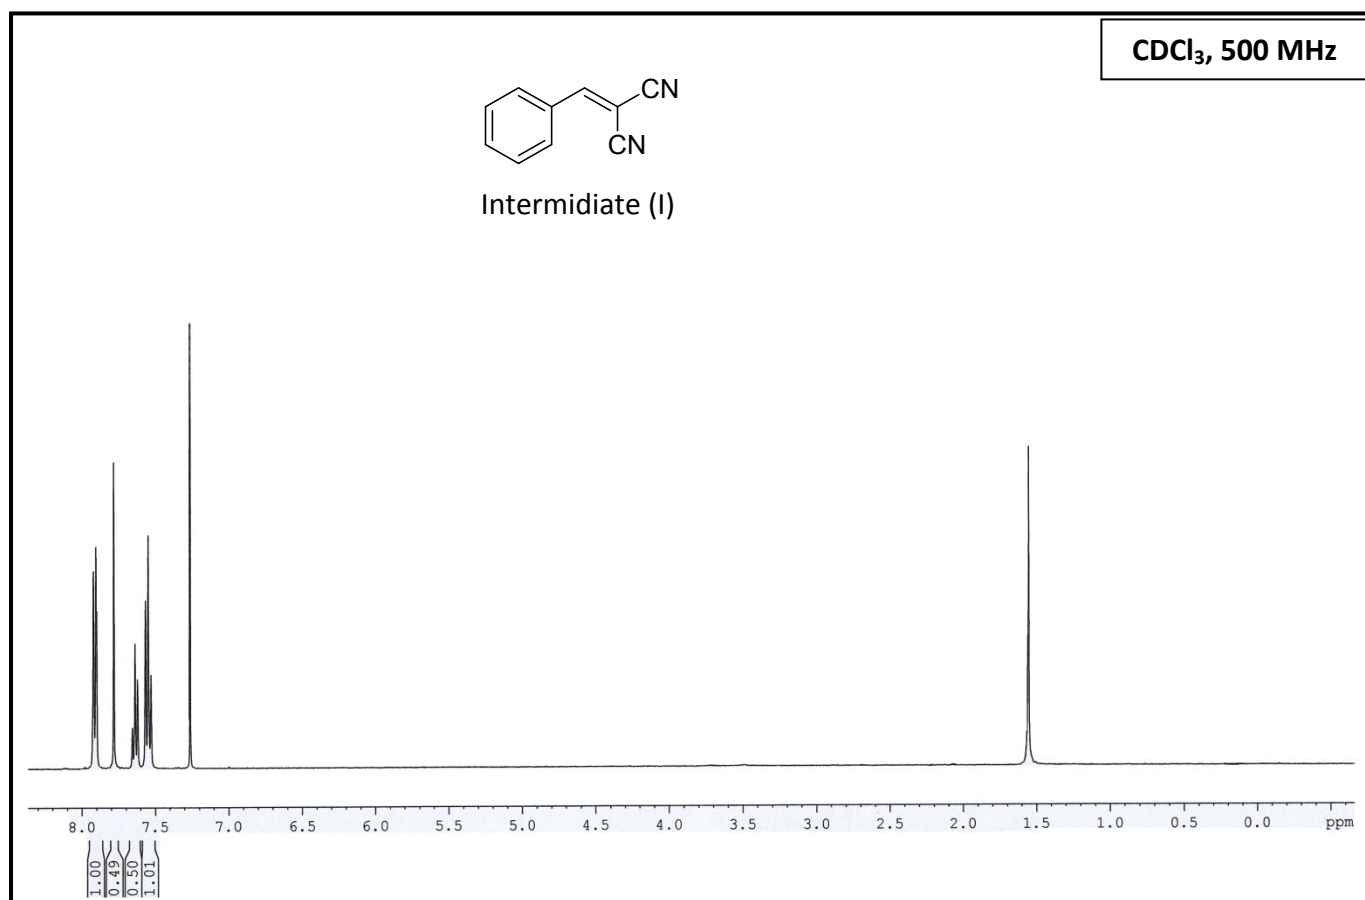

Supplement: c5ra19290k1.pdf [file c5ra19290k1.pdf]
